# Supplementary material for: Targeting E2F Sensitizes Prostate Cancer Cells to Drug-Induced Replication Stress by Promoting Unscheduled CDK1 Activity
Source: Cancers (Basel). 2022 Oct 10;14(19):4952. doi: 10.3390/cancers14194952 (PMC9564059; doi:10.3390/cancers14194952)
Supplement: Supplementary file 1 [file cancers-14-04952-s001.zip › Supplementary Tables_def.xls]

## Sheet: Hoja1
siRNA	Reference
siE2F1 #1	s4406
siE2F1 #2	s4407
siE2F2 #1	s4408
siE2F2 #2	s4410
siTK1 #1	s14160
siTK1 #2	s14159
siDCK #1	s103564
siDCK #2	s187
siCtrl	4390843
Gene	Forward (5´-3´)	Reverse (5´-3´)
E2F1	TGACATCACCAACGTCCTTGA	CTGTGCGAGGTCCTGGGTC
E2F2	ACGTGCTGGAAGGCATCC	GCTCCGTGTTCATCAGCTCC
GMPS	CCTTGGAAACACCAGCATTTG	GATCAAACCAGGGAGCATCTT
UMPS	GTTGGAAGCAGGAGGAGATAAT	GAGATTATGCCACGACCTACAA
RRM2	TATCCCATGTTCTGGCTTTCTT	ACAGCGGGCTTCTGTAATC
TYMS	GATTCTCCACCAGAGAAGAAGG	GTCAACTCCCTGTCCTGAATAA
HPRT	AGGATTTGGAAAGGGTGTTTATTC	CCCATCTCCTTCATCACATCTC
APRT	GCTGAGCTGGAGATTCAGAAA	CTCACAGGCAGCGTTCAT
UCK1	GAGGTGCCGACCTATGATTT	CTGGCTGTAGAACACCAAGAT
TK1	AGAAGGAGGTCGAGGTGATT	CACTGGGCAGTTCTCTTTGT
DCK	CCAGATGGTGCAATGTTCAAAG	CCATCGTTCAGGTTTCTCATACA
WEE1	GCCGAGGCTTGAGGTATATT	TGGGATTGAGGTTCGAGATATG
L19	CTTCAGGTACAGGCTGTGATAC	CTTCAGGTACAGGCTGTGATAC
